# Supplementary material
Source: PubMed Central journal article supplement (PMC5382571)
Supplement: bi6b01213_si_001.pdf [file bi6b01213_si_001.pdf]

**Replication protein A prohibits diffusion of the PCNA sliding clamp along single-stranded DNA**

Mark Hedglin<sup>†</sup> and Stephen J. Benkovic<sup>†,\*</sup>

*<sup>†</sup>Department of Chemistry, The Pennsylvania State University, University Park, PA 16802, U.S.A.*

## Supporting Information

### Supporting Information Figure Legend

**Figure S1** Steady state FRET for the Cy3P/BioT DNA substrate requires a tight-binding protein to stabilize PCNA on DNA. (**Top**) The Cy3PddC/BioT DNA substrate is identical to the Cy3P/BioT DNA substrate (**Figure 1**) except it contains a 3'-dideoxy-terminated primer. **C** denotes a dideoxy-terminating cytosine nucleotide. Human DNA polymerase  $\delta$  binds tight to this substrate in the presence of the first dNTP to be incorporated (dGTP). (**Bottom**) Cy5-PCNA was assembled onto the Cy3-labeled DNA (100 nM of either Cy3P/BioT or Cy3PddC/BioT) under various conditions as indicated and the steady state FRET ( $I_{665}/I_{561}$ ) was measured as described in **Figure 2**. RPA was omitted from all experiments.

### Supporting Information Figure

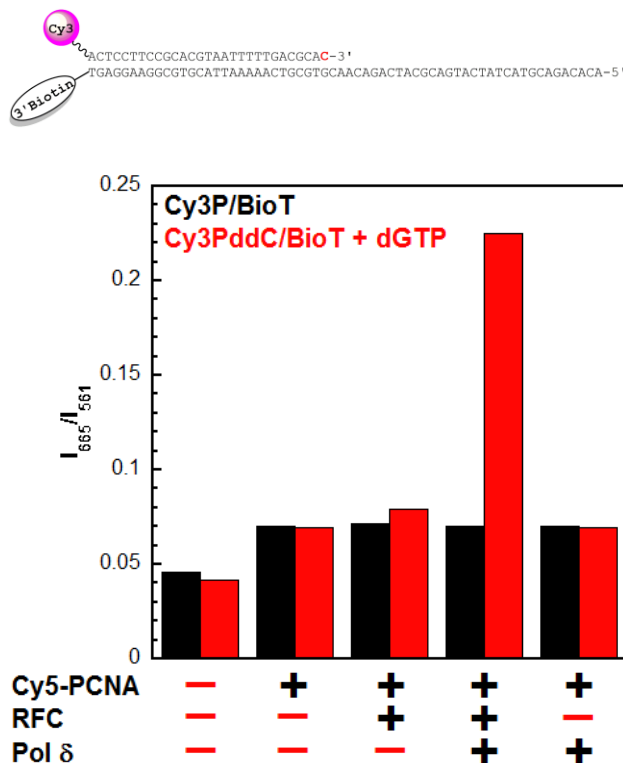

**Figure S1**
